# Supplementary material for: Network Segregation Predicts Processing Speed in the Cognitively Healthy Oldest-old
Source: bioRxiv preprint, doi:10.1101/2021.10.05.463207, version 4 (2022-11-01)
Supplement: Supplementary File 2 [file 463207_file15.docx]

**Supplementary File 2**

|  | **Processing Speed** | **Memory** | **Executive Functioning** | **Working Memory** | **Language** |
| --- | --- | --- | --- | --- | --- |
| WAIS-IV Coding1 | .785 |  |  |  |  |
| Stroop Color-Word Reading Trial2 | .678 |  |  |  |  |
| Trail Making Test A (lines/sec)3 | -.670 |  |  |  |  |
| WAIS-IV Symbol Search1 | .593 |  | .364 |  |  |
| CVLT II Long Delay Recall4 |  | .749 |  |  |  |
| FNAME Total Score5 |  | .709 |  |  |  |
| Craft Story Paraphrase Delay Recall6 |  | .599 |  |  |  |
| WAIS-IV Block Design1 |  |  | .704 |  |  |
| WAIS-IV Matrix Reasoning1 |  |  | .552 |  |  |
| Benson Figure Test Delay Recall6 |  | .362 | .376 |  |  |
| Stroop Color Word-Inhibition Test Interference2 |  |  | .367 |  |  |
| Trail Making Test B (lines/sec) (minus Trail Making Test A (lines/sec))3 |  |  | -.328 |  |  |
| Digit Span Forward6 |  |  |  | .745 |  |
| Digit Span Backward6 |  |  |  | .714 |  |
| WAIS-IV Letter-Number Sequencing1 |  |  |  | .362 |  |
| Letter Verbal Fluency (F & L)7 |  |  |  |  | .661 |
| WAIS-IV Similarities1 |  |  |  |  | .430 |
| Semantic Fluency (Animals)8 |  | .409 |  |  | .421 |

**Factor Loadings for Cognitive Domains:** results of factor analysis with cognitive tests. Loadings above .3 are included. 1 [(Weschler, 2008)](https://sciwheel.com/work/citation?ids=11279046&pre=&suf=&sa=0); 2 [(MacLeod, 1992)](https://sciwheel.com/work/citation?ids=372173&pre=&suf=&sa=0); 3 [(Gaudino, Geisler, & Squires, 1995)](https://sciwheel.com/work/citation?ids=4614290&pre=&suf=&sa=0); 4 [(Delis, Kramer, Kaplan, & Ober, 1987)](https://sciwheel.com/work/citation?ids=8625136&pre=&suf=&sa=0); 5 [(Amariglio et al., 2012)](https://sciwheel.com/work/citation?ids=2717775&pre=&suf=&sa=0); 6 [(Beekly et al., 2007)](https://sciwheel.com/work/citation?ids=8678997&pre=&suf=&sa=0); 7 [(Newcombe, 1969)](https://sciwheel.com/work/citation?ids=12158353&pre=&suf=&sa=0); 8 [(Benton, 1968)](https://sciwheel.com/work/citation?ids=5274496&pre=&suf=&sa=0)
